# Supplementary material for: Prevalence of sleep disturbance and its associated factors among diabetes type-2 patients in Saudi Arabia
Source: Frontiers journal article supplement (doi:10.3389/fpubh.2024.1283629), 2024-11-01
Supplement: Data_Sheet_3.pdf [file Data_Sheet_3.pdf]

## Demographic Information:

Age: \_\_\_\_\_

### Gender:

Male

Female

### Marital Status:

Single

Married

Divorced

Widowed

### Education Level:

- Below High School
- High School
- University

### Diabetes Diagnosis Duration:

- Less than 1 year
- 1-5 years
- More than 5 years

### Diabetes Type:

- Type 1
- Type 2
- Gestational Diabetes
- Other medical conditions (please specify)

### Medical Conditions (Check all applicable):

- High blood pressure
- High cholesterol
- Heart disease
- Obesity
- Sleep disorders
- Kidney problems

### Pittsburgh Sleep Quality Index:

The following questions are about your sleep habits during the past month. Please answer based on most nights in the past month.

**1. When did you usually go to bed at night?**

Usual bedtime: \_\_\_\_\_ (e.g., 10:30 PM)

**2. How long does it usually take you to fall asleep each night?**

Number of minutes: \_\_\_\_\_ (e.g., 10 minutes)

**3. When did you usually wake up in the morning?**

Usual wake-up time: \_\_\_\_\_ (e.g., 7:30 AM)

**4. How many hours of actual sleep did you get each night during the past month?  
(This may differ from the time spent in bed)**

Number of hours of sleep: \_\_\_\_\_ (e.g., 6.5 hours)

**5. How often did you have trouble sleeping because you...**

| S. No | Statements                                                                                                           | Not during the<br>past month | Less than<br>once per week | Once or<br>twice in<br>the week | Three times<br>or more<br>In the week |
|-------|----------------------------------------------------------------------------------------------------------------------|------------------------------|----------------------------|---------------------------------|---------------------------------------|
| 1.    | Could not sleep within 30 minutes                                                                                    |                              |                            |                                 |                                       |
| 2.    | Woke up in the middle of the night or early morning                                                                  |                              |                            |                                 |                                       |
| 3.    | Had to get up to use the bathroom                                                                                    |                              |                            |                                 |                                       |
| 4.    | Could not breathe comfortably                                                                                        |                              |                            |                                 |                                       |
| 5.    | Coughed or snored loudly                                                                                             |                              |                            |                                 |                                       |
| 6.    | Felt too cold                                                                                                        |                              |                            |                                 |                                       |
| 7.    | Felt too hot                                                                                                         |                              |                            |                                 |                                       |
| 8.    | Had bad dreams                                                                                                       |                              |                            |                                 |                                       |
| 9.    | Feeling pain                                                                                                         |                              |                            |                                 |                                       |
| 10.   | Other causes Please explain.....during the past month how many times have you had problems sleeping because of this? |                              |                            |                                 |                                       |

**6. How would you rate your overall sleep quality during the past month?**

- Very good
- Good
- Fairly bad
- Very bad

| S. No | Statements                                                                                                                        | Not during the past month | Less than once per week | Once or twice in the week | Three times or more In the week |
|-------|-----------------------------------------------------------------------------------------------------------------------------------|---------------------------|-------------------------|---------------------------|---------------------------------|
| 7.    | How often did you take medication, prescribed or over-the-counter, to help you sleep during the past month?                       |                           |                         |                           |                                 |
| 8.    | How often did you have trouble staying awake while driving, eating meals, or engaging in social activities during the past month? |                           |                         |                           |                                 |

**9. How much of a problem did you have with keeping up enough enthusiasm to get things done during the past month?**

- No problem at all
- Only a very slight problem
- Somewhat of a problem
- A very big problem

**10. Do you have a bed partner or share the room?**

- No bed partner or room sharing
- A partner in another room
- Bed partner in the same room but not the same bed
- Bed partner in the same bed

**11. If you have a bed partner or share a room, ask him/her during the past month,  
how many times have you had:**

| <b>S. No</b> | <b>Statements</b>                                       | <b>Not during the<br/>past month</b> | <b>Less than<br/>once per week</b> | <b>Once or<br/>twice in<br/>the week</b> | <b>Three times<br/>or more<br/>In the week</b> |
|--------------|---------------------------------------------------------|--------------------------------------|------------------------------------|------------------------------------------|------------------------------------------------|
| 1.           | Snore loudly                                            |                                      |                                    |                                          |                                                |
| 2.           | A long pause in breathing<br>during sleep               |                                      |                                    |                                          |                                                |
| 3.           | Restless legs while asleep<br>(unstable)                |                                      |                                    |                                          |                                                |
| 4.           | Episodes of confusion<br>during sleep                   |                                      |                                    |                                          |                                                |
| 5.           | Any discomfort during<br>sleep: Explain please<br>..... |                                      |                                    |                                          |                                                |
